# Supplementary material
Source: MDPI journal article supplement (https://www.mdpi.com/2075-163X/11/2/174)
Supplement: s1 [file s1]

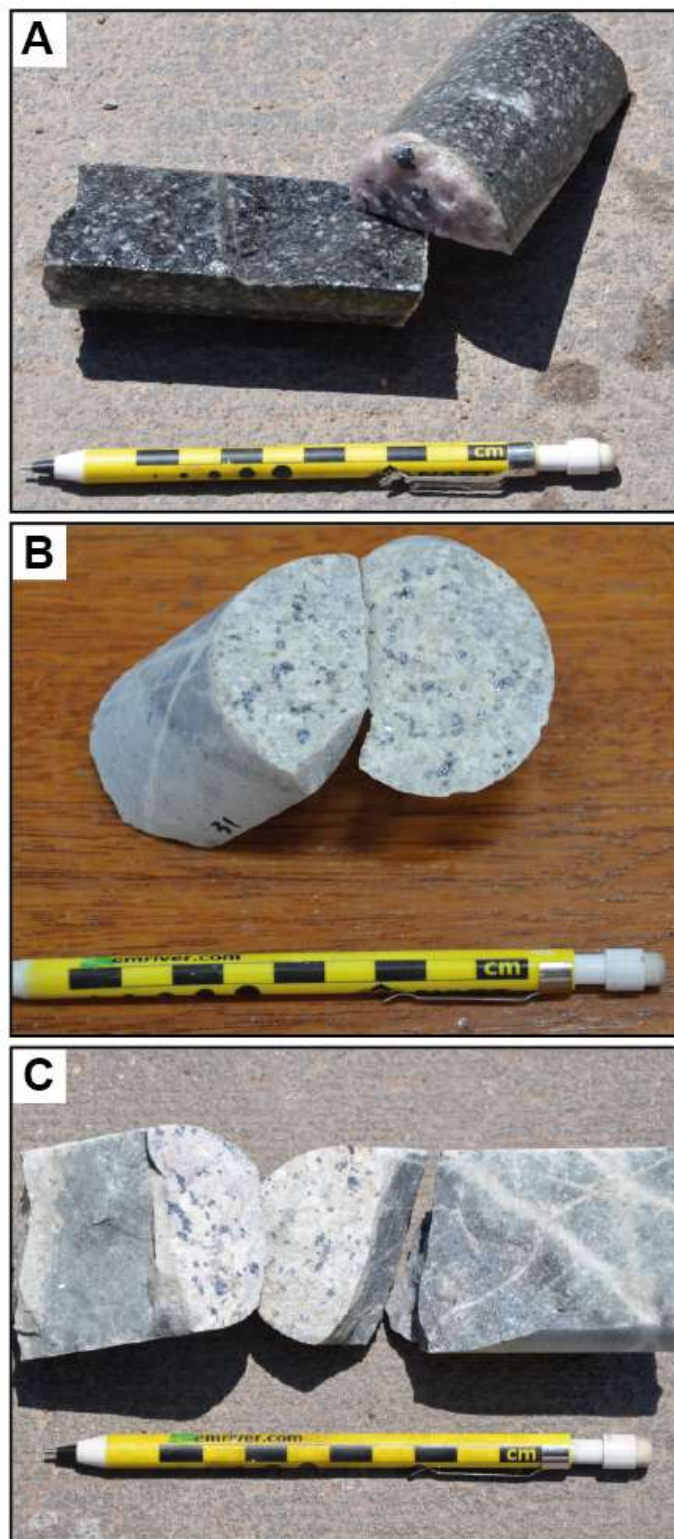

**Figure S1.** Don Manuel core samples selected for Re-Os molybdenite dating. (a) Sample DM4AG35. (b) Sample DM7AG31. (c) Sample DM7AG35. Samples are described in Table 3.

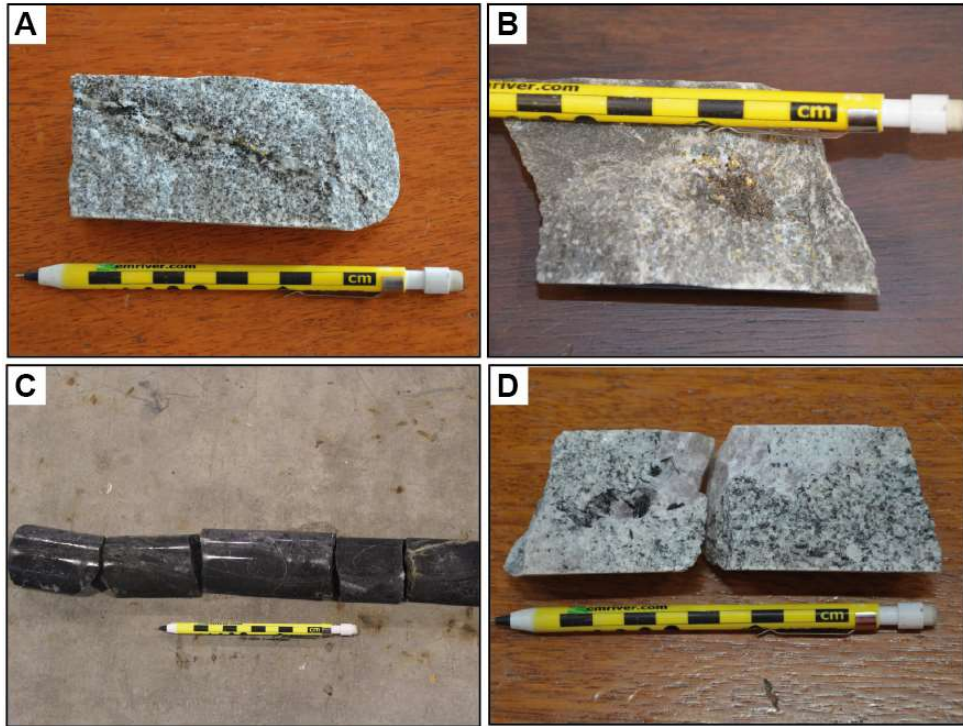

**Figure S2: Don Manuel core samples selected for  $^{40}\text{Ar}/^{39}\text{Ar}$  hydrothermal biotite dating.** (A) Sample DM4AG13. (B) Sample DM6AG22. (C) Sample DM2AG47. (D) Sample DM7AG40. Samples are described in Table 3.

**Table S1.**  $^{40}\text{Ar}$ - $^{39}\text{Ar}$  Geochronology for Don Manuel hydrothermal biotite.

| Sample  | Integrated age (Ma) | $\pm 1\sigma$ | int. $^{40}\text{Ar}^*/^{39}\text{Ar}_K$ | Plateau age (Ma) | $\pm 1\sigma$ w/o J | $\pm 1\sigma$ w/ J | MS WD | Prob. | steps | n/n-total | %gas | Ca/K | $\pm 1\sigma$ Ca/K | Isochron age (Ma) | $\pm 2\sigma$ | $\pm 2\sigma$ (%) | $^{40}\text{Ar}/^{36}\text{Ar}(\text{i})$ | $\pm 2\sigma$ | MS WD | p    | n  |
|---------|---------------------|---------------|------------------------------------------|------------------|---------------------|--------------------|-------|-------|-------|-----------|------|------|--------------------|-------------------|---------------|-------------------|-------------------------------------------|---------------|-------|------|----|
| DM4AG13 | 3.57                | 0.11          | 7.654                                    | 3.569            | 0.019               | 0.07               | 0.8   | 0.54  | 6-12  | 7/14      | 90.5 | 0.01 | 0.01               | 3.55              | 0.05          | 1.5               | 314                                       | 18            | 0.4   | 0.85 | 7  |
| DM6AG22 | 3.51                | 0.09          | 7.508                                    | 3.512            | 0.019               | 0.09               | 1.2   | 0.32  | 3-12  | 10/14     | 96.9 | 0.15 | 0.02               | 3.48              | 0.07          | 2.0               | 309.6                                     | 9.2           | 0.5   | 0.83 | 10 |
| DM2AG47 | 3.40                | 0.07          | 7.316                                    | 3.408            | 0.010               | 0.08               | 0.5   | 0.84  | 3-11  | 8/13      | 92.5 | 0.04 | 0.02               | 3.41              | 0.06          | 1.6               | 297.8                                     | 2.0           | 0.5   | 0.83 | 8  |
| DM7AG40 | 3.35                | 0.19          | 7.136                                    | 3.374            | 0.012               | 0.12               | 1.4   | 0.23  | 5-12  | 7/13      | 81.5 | 1.1  | 0.7                | 3.36              | 0.09          | 2.6               | 304.4                                     | 4.6           | 0.3   | 0.92 | 7  |
